# Supplementary material for: Micronutrient Status of Recreational Runners with Vegetarian or Non-Vegetarian Dietary Patterns
Source: PubMed Central journal article supplement (PMC6566694; doi:10.3390/nu11051146), 2019-05-22
Supplement: nutrients-11-01146-s001.pdf [file nutrients-11-01146-s001.pdf]

1 *Article – Supplementary Material*

2 **Micronutrient status of recreational runners with**  
3 **vegetarian or non-vegetarian dietary patterns**

4 **Josefine Nebl<sup>1</sup>, Jan Philipp Schuchardt<sup>1</sup>, Paulina Wasserfurth<sup>1</sup>, Sven Haufe<sup>2</sup>, Julian Eigendorf<sup>2</sup>,**  
5 **Uwe Tegtbur<sup>2</sup>, Alexander Ströhle<sup>1</sup> and Andreas Hahn<sup>1\*</sup>**

6 <sup>1</sup> Faculty of Natural Sciences, Institute of Food Science and Human Nutrition, Leibniz University Hannover,  
7 30159 Hannover, Germany; nebl@nutrition.uni-hannover.de (JN); schuchardt@nutrition.uni-hannover.de  
8 (JPS); wasserfurth@nutrition.uni-hannover.de (PW); hahn@nutrition.uni-hannover.de (AH)

9 <sup>2</sup> Institute of Sports Medicine, Hannover Medical School, 30625 Hannover, Germany;  
10 Haufe.Sven@mh-hannover.de (SH); Eigendorf.Julian@mh-hannover.de (JE);  
11 Tegtbur.Uwe@mh-hannover.de (UT)

12 \* Correspondence: hahn@nutrition.uni-hannover.de; Tel.: +49-511-762-5093

**Table S 1.** Biomarkers of iron status and hematological parameters according to gender.

| Parameter                        |   | Omnivores<br>n=27 | p value<br>Omnivores<br><i>vs.</i> Lacto-Ovo | Lacto-ovo<br>n=26 | p value<br>Lacto-Ovo <i>vs.</i><br>Vegan | Vegan<br>n=28 | p value<br>Omnivores<br><i>vs.</i> Vegan | p value            |
|----------------------------------|---|-------------------|----------------------------------------------|-------------------|------------------------------------------|---------------|------------------------------------------|--------------------|
| Vitamin B <sub>12</sub> , pmol/l | f | 302±116           | -                                            | 345±134           | -                                        | 324±301       | -                                        | 0.273 <sup>b</sup> |
|                                  | m | 353±127           | -                                            | 281±188           | -                                        | 311±145       | -                                        | 0.317 <sup>b</sup> |
| Deficient (< 150 pmol/l), n (%)  | f | 1 (4)             |                                              | 0 (0)             |                                          | 2 (7)         |                                          |                    |
|                                  | m | 0 (0)             |                                              | 2 (8)             |                                          | 1 (4)         |                                          |                    |
| Holo-TC, pmol/l                  | f | 80.8±32.3         | n.s.                                         | 79.8±28.0         | 0.042 <sup>c</sup>                       | 67.9±39.6     | n.s.                                     | 0.047 <sup>a</sup> |
|                                  | m | 79.8±28.0         | -                                            | 68.1±34.4         | -                                        | 67.7±41.1     | -                                        | 0.662 <sup>a</sup> |
| Deficient (< 35 pmol/l), n (%)   | f | 1 (4)             |                                              | 1 (4)             |                                          | 4 (14)        |                                          |                    |
|                                  | m | 0 (0)             |                                              | 1 (4)             |                                          | 2 (7)         |                                          |                    |
| MMA, nmol/l                      | f | 270±181           | -                                            | 253±171           | -                                        | 448±703       | -                                        | 0.687 <sup>b</sup> |
|                                  | m | 253±171           | -                                            | 331±227           | -                                        | 209±73        | -                                        | 0.062 <sup>b</sup> |
| Deficient (> 271 nmol/l), n (%)  | f | 3 (11)            |                                              | 2 (8)             |                                          | 5 (18)        |                                          |                    |
|                                  | m | 2 (7)             |                                              | 4 (15)            |                                          | 2 (7)         |                                          |                    |
| tHcy, µmol/l                     | f | 11.5±3.37         | -                                            | 13.2±1.85         | -                                        | 12.0±3.52     | -                                        | 0.514 <sup>b</sup> |
|                                  | m | 13.2±1.85         | -                                            | 16.5±8.37         | -                                        | 14.4±5.20     | -                                        | 0.462 <sup>b</sup> |
| > 10 µmol/l, n (%)               | f | 1 (4)             |                                              | 3 (12)            |                                          | 3 (11)        |                                          |                    |
|                                  | m | 2 (7)             |                                              | 6 (23)            |                                          | 3 (11)        |                                          |                    |
| 4cB12                            | f | 0.90              | -                                            | 1.15              | -                                        | 0.66          | -                                        | 0.148 <sup>a</sup> |
|                                  | m | 0.92              | -                                            | 0.53              | -                                        | 0.77          | -                                        | 0.359 <sup>a</sup> |

f = female, m = male, Holo-TC = holotranscobalamin, MMA = methylmalonic acid, 4cB12 = 4 markers combined vitamin B-12 indicator [25], n.s. = not significant, tHcy = total homocysteine. Values are given as means ± SD or n (%) of the study population in the different cut-off values. <sup>a</sup> One-way ANOVA, <sup>b</sup> Kruskal Wallis test, <sup>c</sup> Post Hoc test.

**Table S 2.** Biomarkers of vitamin D status according to gender.

| Parameter                                |   | Omnivores<br>n=27 | Lacto-ovo<br>n=26 | Vegan<br>n=28 | p value            |
|------------------------------------------|---|-------------------|-------------------|---------------|--------------------|
| 25(OH)D, nmol/l                          | f | 98.2±30.9         | 85.0±39.5         | 87.4±40.0     | 0.516 <sup>a</sup> |
|                                          | m | 79.5±31.9         | 65.5±21.4         | 88.0±41.0     |                    |
| Optimal<br>(≥75 nmol), n (%)             | f | 12 (44)           | 8 (31)            | 9 (32)        | 0.308 <sup>a</sup> |
|                                          | m | 6 (22)            | 3 (12)            | 7 (25)        |                    |
| Sufficiency<br>(50-74.9 nmol/l), n (%)   | f | 4 (15)            | 4 (15)            | 5 (18)        | 0                  |
|                                          | m | 2 (7)             | 5 (19)            | 0             |                    |
| Insufficiency<br>(25-49.9 nmol/l), n (%) | f | 0                 | 3 (12)            | 2 (7)         | 2 (7)              |
|                                          | m | 3 (11)            | 2 (8)             | 2 (7)         |                    |
| Deficiency<br>(<25 nmol/l), n (%)        | f | 0                 | 0                 | 1 (4)         | 1 (4)              |
|                                          | m | 0                 | 0                 | 1 (4)         |                    |

f = female, m = male, 25(OH)D = 25-hydroxyvitamin D. Values are given as means ± SD or n (%) of the study population in the different cut-off values. <sup>a</sup> One-way ANOVA.

16 **Table S 3.** Biomarkers of iron status and hematological parameters according to supplement intake.

| Parameter                                                            |        | Omnivores<br>n=27 | Lacto-ovo<br>n=26 | Vegan<br>n=28   | p value            |
|----------------------------------------------------------------------|--------|-------------------|-------------------|-----------------|--------------------|
| Iron serum, $\mu\text{mol/l}$                                        | SU     | 19.4 $\pm$ 4.74   | 12.6 $\pm$ 3.58   | 13.1 $\pm$ 4.99 | 0.277 <sup>a</sup> |
|                                                                      | non-SU | 17.5 $\pm$ 8.43   | 18.7 $\pm$ 7.91   | 17.5 $\pm$ 6.38 | 0.839 <sup>a</sup> |
| Deficiency<br>( $<10 \mu\text{mol/l}$ ), n (%)                       | SU     | 0 (0)             | 1 (4)             | 1 (4)           |                    |
|                                                                      | non-SU | 7 (26)            | 4 (15)            | 1 (4)           |                    |
| Ferritin, $\mu\text{g/l}$                                            | SU     | 59.0 $\pm$ 24.0   | 32.7 $\pm$ 19.5   | 40.8 $\pm$ 22.4 | 0.408 <sup>b</sup> |
|                                                                      | non-SU | 62.6 $\pm$ 57.5   | 40.4 $\pm$ 34.7   | 45.7 $\pm$ 33.7 | 0.706 <sup>b</sup> |
| Depleted iron stores<br>( $< 15 \mu\text{g/l}$ ), n (%)              | SU     | 0 (0)             | 0 (0)             | 1 (4)           |                    |
|                                                                      | non-SU | 7 (26)            | 6 (23)            | 3 (11)          |                    |
| Transferrin, $\mu\text{mol/l}$                                       | SU     | 36.4 $\pm$ 1.78   | 44.8 $\pm$ 4.04   | 36.4 $\pm$ 1.78 | 0.061 <sup>b</sup> |
|                                                                      | non-SU | 42.1 $\pm$ 12.2   | 39.7 $\pm$ 6.88   | 40.4 $\pm$ 7.53 | 0.957 <sup>b</sup> |
| Increased iron requirement<br>( $\geq 47.7 \mu\text{mol/l}$ ), n (%) | SU     | 0 (0)             | 1 (4)             | 0 (0)           |                    |
|                                                                      | non-SU | 6 (22)            | 3 (12)            | 3 (11)          |                    |
| Transferrin saturation                                               | SU     | 26.5 $\pm$ 4.95   | 14.0 $\pm$ 4.36   | 17.8 $\pm$ 6.65 | 0.129 <sup>a</sup> |
|                                                                      | non-SU | 23.2 $\pm$ 14.3   | 24.4 $\pm$ 11.1   | 23.1 $\pm$ 10.4 | 0.913 <sup>a</sup> |
| Insufficient iron supply<br>( $< 16\%$ ), n (%)                      | SU     | 0 (0)             | 1 (4)             | 2 (7)           |                    |
|                                                                      | non-SU | 10 (37)           | 5 (19)            | 7 (25)          |                    |
| Hb, g/dl                                                             | SU     | 13.9 $\pm$ 1.48   | 14.9 $\pm$ 0.76   | 13.5 $\pm$ 0.59 | 0.166 <sup>a</sup> |
|                                                                      | non-SU | 13.9 $\pm$ 1.42   | 14.0 $\pm$ 1.04   | 14.1 $\pm$ 1.47 | 0.825 <sup>a</sup> |
| Anemia<br>( $< 12.0/13.0 \text{ g/dl}$ ), n (%)                      | SU     | 3 (11)            | 0 (0)             | 4 (14)          |                    |
|                                                                      | non-SU | 0 (0)             | 1 (4)             | 0               |                    |
| Hct, l/l                                                             | SU     | 0.41 $\pm$ 0.04   | 0.45 $\pm$ 0.02   | 0.40 $\pm$ 0.02 | 0.087 <sup>a</sup> |
|                                                                      | non-SU | 0.41 $\pm$ 0.04   | 0.41 $\pm$ 0.03   | 0.43 $\pm$ 0.04 | 0.263 <sup>a</sup> |
| $< 0.36 \text{ (f)}/0.39 \text{ (m)}$ , n (%)                        | SU     | 0 (0)             | 0 (0)             | 0 (0)           |                    |
|                                                                      | non-SU | 0 (0)             | 0 (0)             | 0 (0)           |                    |
| MCV, fl                                                              | SU     | 87.9 $\pm$ 4.03   | 91.0 $\pm$ 2.80   | 88.0 $\pm$ 4.00 | 0.543 <sup>a</sup> |
|                                                                      | non-SU | 87.4 $\pm$ 3.79   | 88.8 $\pm$ 4.59   | 89.0 $\pm$ 3.91 | 0.365 <sup>a</sup> |
| Iron deficiency anemia<br>( $< 80 \text{ fl}$ ), n (%)               |        | 0 (0)             | 0 (0)             | 0 (0)           |                    |

SU = supplement-users, non-SU = non-supplement users, MCV = Mean Corpuscular Volume. Values are given as means  $\pm$  SD or n (%) of the population in the different cut-off values. <sup>a</sup> One-way ANOVA,

<sup>b</sup> Kruskal Wallis test.
